# Supplementary material for: Combined effects of leaks, respiratory system properties and upper airway patency on the performance of home ventilators: a bench study
Source: Springer Nature journal article supplement (doi:10.1186/s12890-017-0487-2), 2017-11-21
Supplement: MOESM2 [file 15240804]

1 **Combined effects of leaks, respiratory system properties and upper airway patency on**  
 2 **the performance of home ventilators: A bench study**

3 Kaixian Zhu, Claudio Rabec, Jesús Gonzalez-Bermejo, Sébastien Hardy, Sami Aouf, Pierre Escourrou  
 4 and Gabriel Roisman

5

6 **Additional File 2: Study of equivalent ventilatory settings**

7 The three included ventilators were firstly evaluated for their ventilatory settings, such as inspiratory  
 8 trigger sensitivity, pressure rise time and I:E cycling, in order to establish equivalent settings for the  
 9 study.

10 The ventilator was connected to ASL5000 through a 1.8-meter long and 22-mm diameter tubing. A  
 11 calibrated intentional leak port (24 L/min at 10 cmH<sub>2</sub>O) was coupled at the outlet of ASL5000. The  
 12 ASL5000 was configured to simulate an obstructive respiratory system (COPD condition) with the  
 13 resistance and compliance set at 20 cmH<sub>2</sub>O·s·L<sup>-1</sup> and 50 ml·cmH<sub>2</sub>O<sup>-1</sup> respectively.

14

15 **i. Inspiratory trigger sensitivity**

16 The ASL5000 generated breathing efforts with inspiratory muscular pressure (P<sub>mus</sub>) varying from 1  
 17 cmH<sub>2</sub>O to 10 cmH<sub>2</sub>O in a stepwise manner with increment of 1 cmH<sub>2</sub>O. Each effort was repeated 15  
 18 times (20 times for P<sub>mus</sub>=1 cmH<sub>2</sub>O). The ventilators were set to spontaneous pressure mode which  
 19 delivered spontaneous-triggered ventilatory supports. The other ventilatory settings are shown in Table  
 20 S2-1.

21 **Table S2-1: Ventilatory settings of the ventilators for the study of inspiratory trigger sensitivity**

|      | Mode    | Rising time | I:E cycling | Ti min-max (s) |
|------|---------|-------------|-------------|----------------|
| A150 | S       | 200 ms      | Medium      | 0,8-1,5        |
| T100 | S       | 2           | 40%         | 1,5            |
| V60  | Support | 2           | 4           | 0,8-1,5        |

22 Bpm: breath per minute. A150: Astral™ 150; T100: Trilogy™ 100; V60: Vivo™ 60. Since the breathing rate of  
 23 V60 cannot be disabled, a minimum breathing rate that equal to 4 bpm was applied.

24

25

26 For each inspiratory trigger sensitivity setting, the minimal P<sub>mus</sub> which could trigger the ventilator  
 27 without autotriggered cycles was noted. An example is given in Figure S2-1.

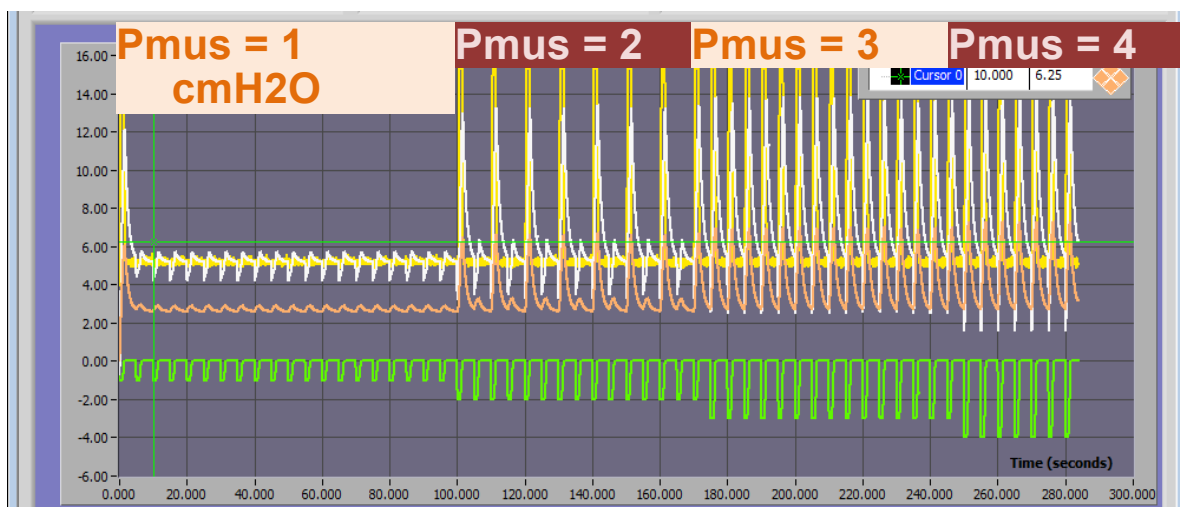

28  
 29

1 **Figure S2-1: Example of inspiratory trigger sensitivity setting test.** Yellow curve: airway pressure; Green  
 2 curve: Pmus. The minimal Pmus which can trigger the device without autotriggered cycles was noted. In this  
 3 example, the inspiratory trigger of A150 was set at medium and the minimal Pmus was 3 cmH<sub>2</sub>O.  
 4

5 Thus, the equivalent inspiratory trigger sensitivity settings among the three ventilators could be  
 6 obtained and the results are shown in Table S2-2.

7 **Table S2-2: Comparison of inspiratory trigger settings between ventilators.**

| Pmus (cmH <sub>2</sub> O) | Corresponding inspiratory peak flow (L/min) | Inspiratory trigger sensitivity settings with which the ventilator responds without autotriggered cycles |               |            |                  |
|---------------------------|---------------------------------------------|----------------------------------------------------------------------------------------------------------|---------------|------------|------------------|
|                           |                                             | A150                                                                                                     | T100 (L/min*) | V60 (a.u.) |                  |
| 1                         | 2.5                                         |                                                                                                          | 1, 2          | 1**        | Most sensitive   |
| 2                         | 5                                           | Very high and High                                                                                       | 3, 4, 5       | 2, 3, 4, 5 |                  |
| 3                         | 7.5                                         | Medium                                                                                                   | 6, 7          | 6, 7, 8, 9 |                  |
| 4                         | 10                                          | Low                                                                                                      | 8, 9          |            |                  |
| 5                         | 12.5                                        |                                                                                                          |               |            |                  |
| 6                         | 15                                          | Very low                                                                                                 |               |            | Most insensitive |

8 \* according to the user manual of T100; \*\*Autotriggered cycles were already present. Pmus: inspiratory  
 9 muscular pressure. A150: Astral<sup>TM</sup> 150; T100: Trilogy<sup>TM</sup> 100; V60: Vivo<sup>TM</sup> 60. Note that the inspiratory  
 10 trigger sensitivity settings of V60 are presented as arbitrary unit (a.u.).  
 11

12 According to our protocol which is mentioned in the main text, each test was started with the  
 13 intermediate inspiratory trigger sensitivity for each ventilator, i.e., “Medium” for A150, “5” for T100  
 14 and V60.

15 **ii. Pressure rise time**

16 The ASL5000 was configured in passive lung mode which did not present any breathing effort. The  
 17 ventilators were set to pressure-control ventilation mode delivering mandatory ventilatory cycles at a  
 18 rate of 12 breath per minute (bpm). The other ventilatory settings are shown in Table S2-3.

19 **Table S2-3: Ventilatory settings of the ventilators for the study of rising time**

|      | Mode           | EPAP-IPAP (cmH <sub>2</sub> O) | Inspiratory trigger | Ti (s) | Breathing rate (bpm) |
|------|----------------|--------------------------------|---------------------|--------|----------------------|
| A150 | PAC            | 5-15                           | OFF                 | 1.5    | 12                   |
| T100 | T              | 5-15                           | n/a                 | 1.5    | 12                   |
| V60  | Assist/Control | 5-15                           | OFF                 | 1.5    | 12                   |

20 EPAP: expiratory positive airway pressure; IPAP: inspiratory positive airway pressure. Ti: inspiratory time.  
 21 A150: Astral<sup>TM</sup> 150; T100: Trilogy<sup>TM</sup> 100; V60: Vivo<sup>TM</sup> 60.  
 22

23 The time required for airway pressure to rise from 10% to 90% of the demanded pressure support (6 to  
 24 14 cmH<sub>2</sub>O) were measured and averaged over 5 cycles. An example is shown in Figure S2-2.

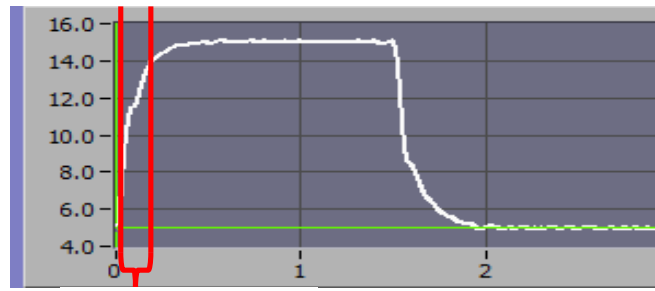

**Rising time  
(ms)**

1  
2 **Figure S2-2: Example of rising time setting test.** The time required for the airway pressure to rise from 10% to  
3 90% (6 to 14 cmH<sub>2</sub>O in this example) was measured.  
4

5 Results are shown in Table S2-4. The rising time settings chosen for the three home ventilators in the  
6 current study are marked in bold characters in Table S2-4.

7 **Table S2-4. Comparison of pressure rising time settings between ventilators.**

| A150          |                    | T100     |                    | V60      |                    |
|---------------|--------------------|----------|--------------------|----------|--------------------|
| Settings (ms) | Measured time (ms) | Settings | Measured time (ms) | Settings | Measured time (ms) |
| Min           | 136                | <b>1</b> | <b>197</b>         | 1        | 142                |
| 150           | 175                | 2        | 410                | <b>2</b> | <b>229</b>         |
| <b>200</b>    | <b>215</b>         | 3        | 584                | 3        | 306                |
| 300           | 297                | 4        | 800                | 4        | 370                |
| 400           | 382                | 5        | 995                | 5        | 455                |
| 500           | 479                | 6        | 1192               | 6        | 516                |
| 600           | 568                |          |                    | 7        | 581                |
|               |                    |          |                    | 8        | 647                |
|               |                    |          |                    | 9        | 716                |

8 Results were presented as mean values averaged over 5 ventilatory cycles. A150: Astral<sup>TM</sup> 150; T100: Trilogy<sup>TM</sup>  
9 100; V60: Vivo<sup>TM</sup> 60.  
10  
11

12 **iii. Cycling from I to E (in %)**

13 The ASL5000 generated breathing efforts with P<sub>mus</sub> equal to 4 cmH<sub>2</sub>O to trigger the ventilatory  
14 cycles. The ventilators were set to spontaneous pressure mode. The other ventilatory settings are  
15 shown in Table S2-5.

16 **Table S2-5: Ventilatory settings of the ventilators for the study of I:E cycling**

|      | Mode    | EPAP-<br>IPAP | Inspiratory<br>trigger | Rising time | Ti min-<br>max (s) | Breathing<br>rate. (bpm) |
|------|---------|---------------|------------------------|-------------|--------------------|--------------------------|
| A150 | S       | 5-15          | Medium                 | Min         | 0.1-3              | OFF                      |
| T100 | S       | 5-15          | 6                      | 1           | 3                  | n/a                      |
| V60  | Support | 5-15          | 6                      | 1           | 0.3-3              | 4                        |

17 EPAP: expiratory positive airway pressure; IPAP: inspiratory positive airway pressure. Ti: inspiratory time.  
18 A150: Astral<sup>TM</sup> 150; T100: Trilogy<sup>TM</sup> 100; V60: Vivo<sup>TM</sup> 60.  
19

20 The ratio of flow amplitude between the value at the end of inspiratory support (switching from IPAP  
21 to EPAP) and the maximal value were calculated and averaged over 5 cycles. An example is given in  
22 Figure S2-3.

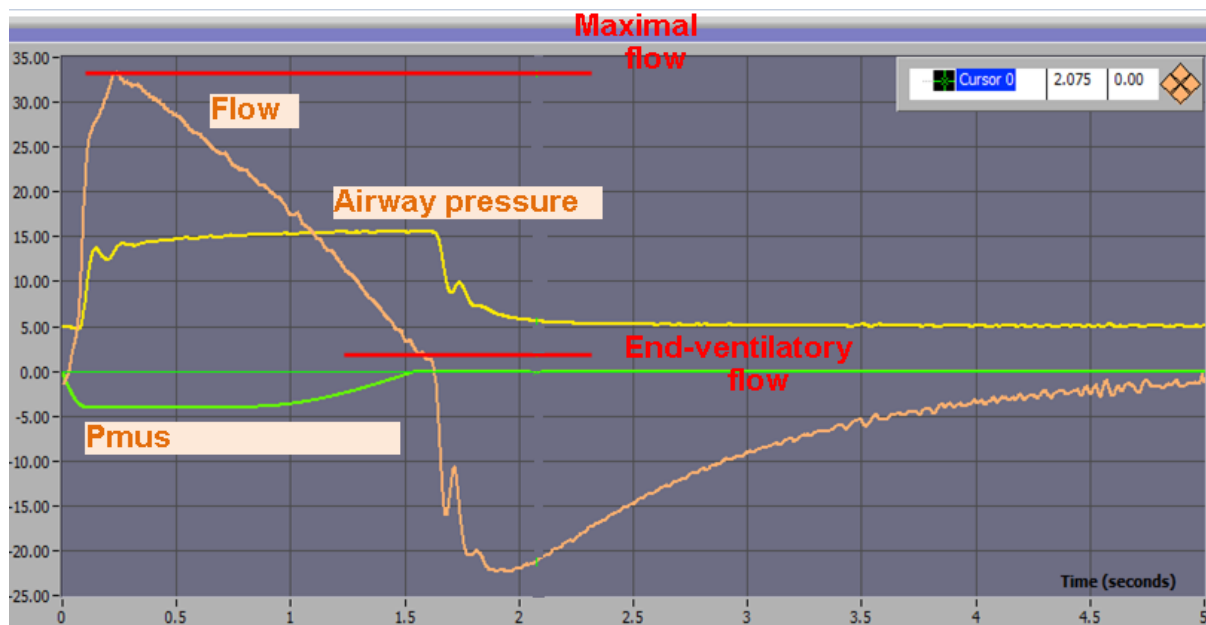

1  
2 **Figure S2-3: Example of I:E cycling setting test.** The ratio of flow amplitude between the value at the end of  
3 inspiratory support and the maximal value were calculated. In this example, the I:E cycling of V60 was set at 9,  
4 and the obtained ratio was equal to 4%.  
5

6 Results are shown in Table S2-6. The I:E cycling settings chosen for the three home ventilators in the  
7 current study are marked in bold characters in Table S2-6.

8 **Table S2-6. Comparison of I:E cycling settings between ventilators**

| A150        |                                                   | T100      |                                                   | V60      |                                                   |
|-------------|---------------------------------------------------|-----------|---------------------------------------------------|----------|---------------------------------------------------|
| Settings    | Ratio between end insp. support and maxi flow (%) | Settings  | Ratio between end insp. support and maxi flow (%) | Settings | Ratio between end insp. support and maxi flow (%) |
| Very low    | 7                                                 | 10        | 11                                                | 1        | 85                                                |
| Low         | 12                                                | 20        | 20                                                | 2        | 74                                                |
| Medium      | 26                                                | 30        | 28                                                | 3        | 63                                                |
| <b>High</b> | <b>35</b>                                         | <b>40</b> | <b>38</b>                                         | 4        | 51                                                |
| Very high   | 50                                                | 50        | 46                                                | <b>5</b> | <b>41</b>                                         |
|             |                                                   | 60        | 60                                                | 6        | 32                                                |
|             |                                                   | 70        | 68                                                | 7        | 23                                                |
|             |                                                   | 80        | 77                                                | 8        | 13                                                |
|             |                                                   | 90        | 87                                                | 9        | 4                                                 |

9 Results were presented as mean values averaged over 5 ventilatory cycles. A150: Astral<sup>TM</sup> 150; T100: Trilogy<sup>TM</sup>  
10 100; V60: Vivo<sup>TM</sup> 60.
